# Supplementary material for: Solution-processed antimony-doped IGZTO thin-film transistors exhibiting superior operational stability under extreme environmental conditions
Source: Royal Society of Chemistry journal article supplement (doi:10.1039/d5tc01349f), 2025-01-01
Supplement: d5tc01349f1.pdf [file d5tc01349f1.pdf]

## Supporting Information

### **Solution-processed antimony-doped IGZTO thin-film transistors exhibiting superior operational stability in extreme environmental conditions**

*Eun Jin Park<sup>1,2</sup>, Bu Kyeong Hwang<sup>1</sup>, Bo Ram Lee<sup>1</sup>, In Pyo Park<sup>1</sup>, Hyun sung Jung<sup>1</sup>, Min-Kyu Son<sup>1</sup>, Hyeon Jin Jung<sup>1\*\*\*</sup>, Pung Keun Song<sup>2\*\*</sup> and Soo Won Heo<sup>1\*</sup>*

## Supporting information

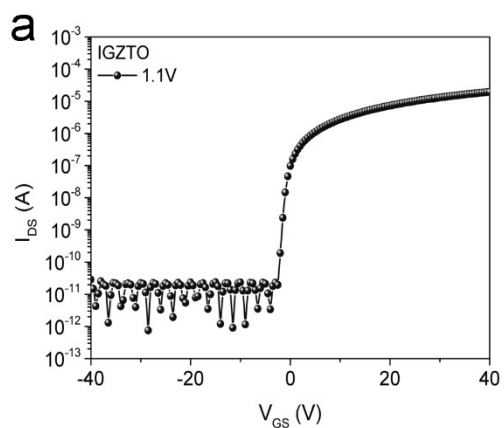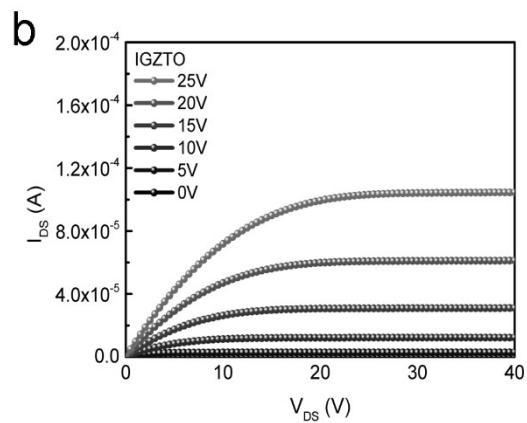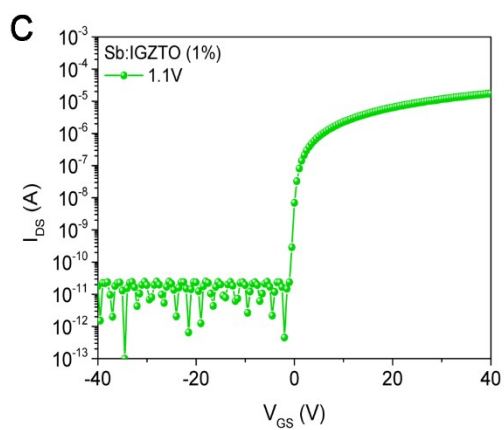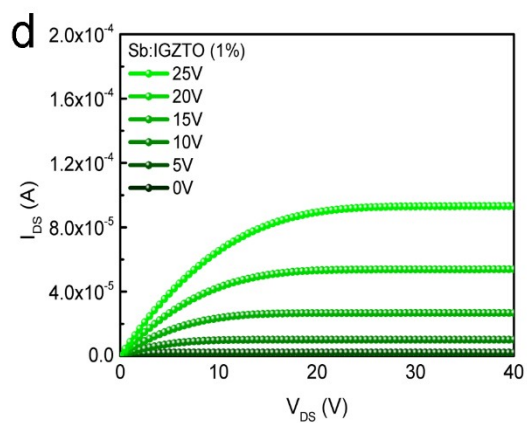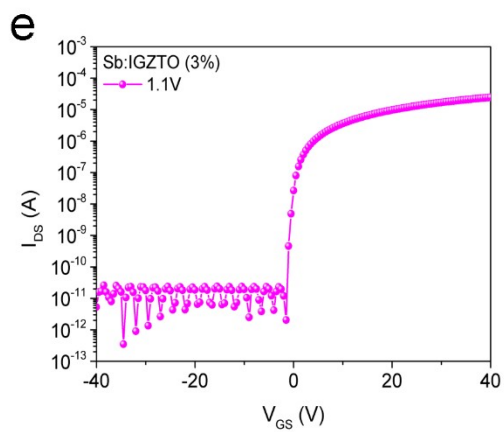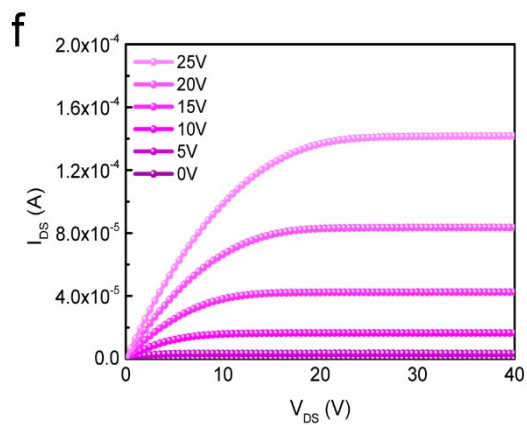

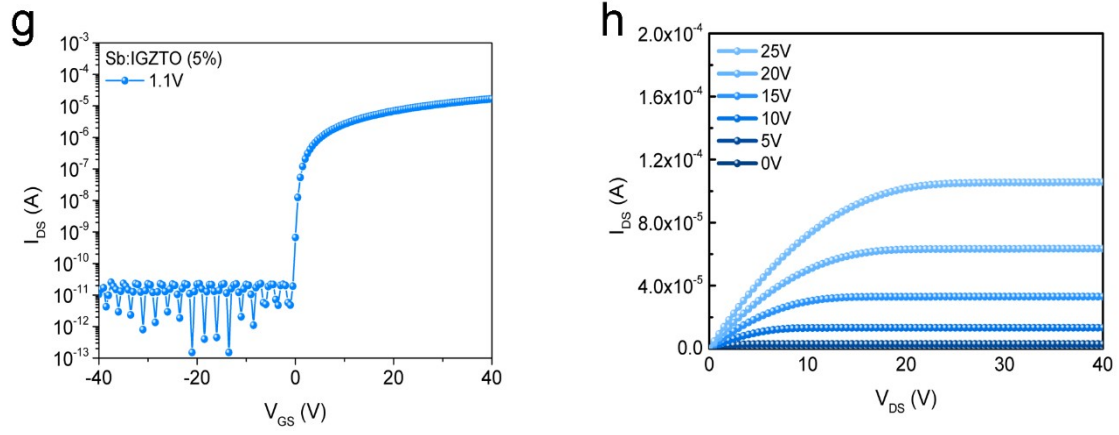

**Figure S1.** Transfer ( $I_{DS}$ – $V_{GS}$ ) and Output ( $I_{DS}$ – $V_{DS}$ ) characteristics of (a-b) IGZTO, (c-d) Sb:IGZTO(1%), (e-f) Sb:IGZTO(3%), (g-h) Sb:IGZTO(5%) TFTs.

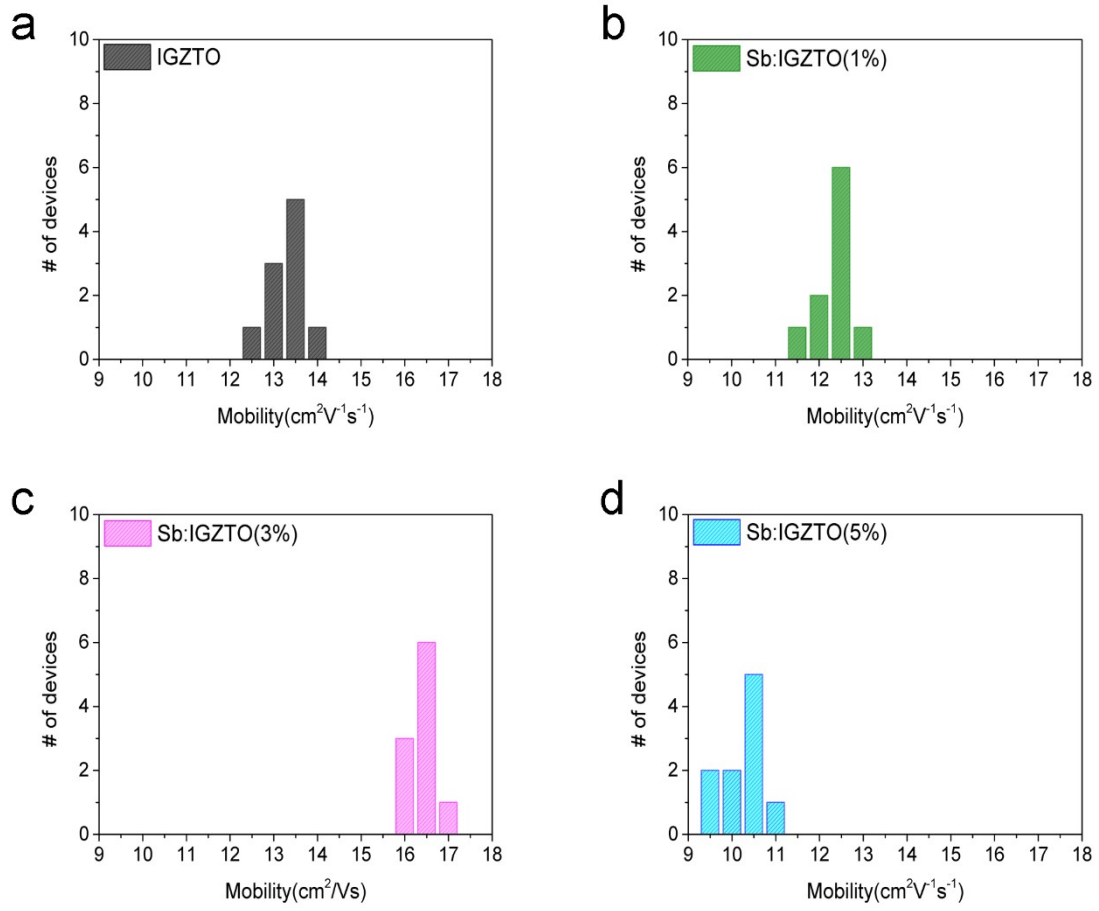

**Figure S2.** Mobility distributions of the (a) IGZTO TFTs, (b) Sb:IGZTO(1%), (c) Sb:IGZTO(3%) and (d) Sb:IGZTO(5%) TFTs , respectively.

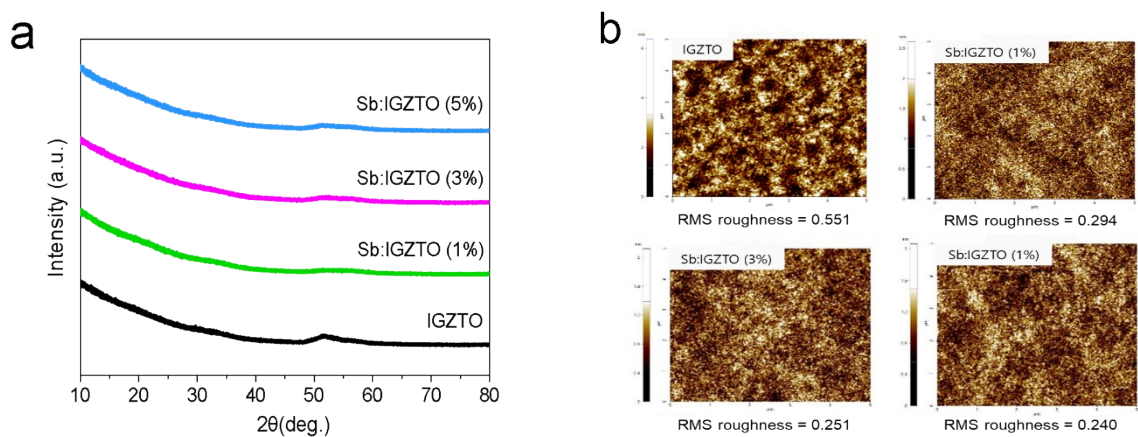

**Figure S3.** (a) GIXRD patterns and (b) AFM images of IGZTO films with various Sb doping levels.

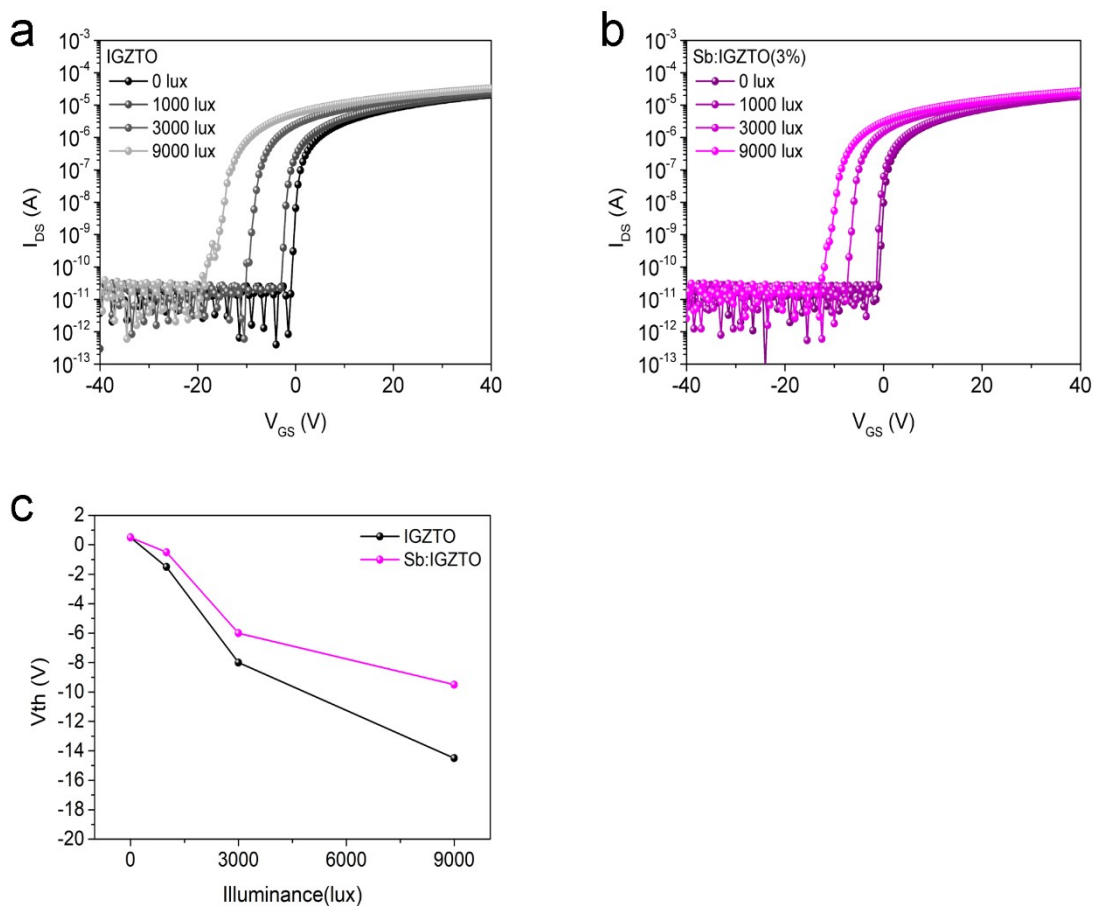

**Figure S4.** (a) Photo-response of the IGZTO TFTs and Sb:IGZTO(3%) TFTs. (b) threshold voltage shift of the IGZTO TFTs and Sb:IGZTO(3%) TFTs under photo-response, respectively.

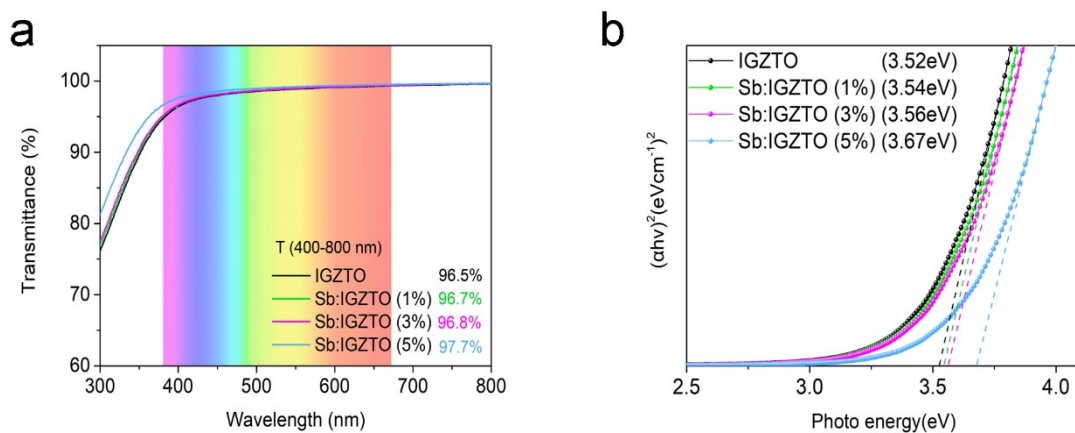

**Figure S5.** (a) Transmittance spectra and (b) Tauc plot optical bandgaps calculated from UV–vis absorbance spectra for IGZTO films with various Sb concentrations.

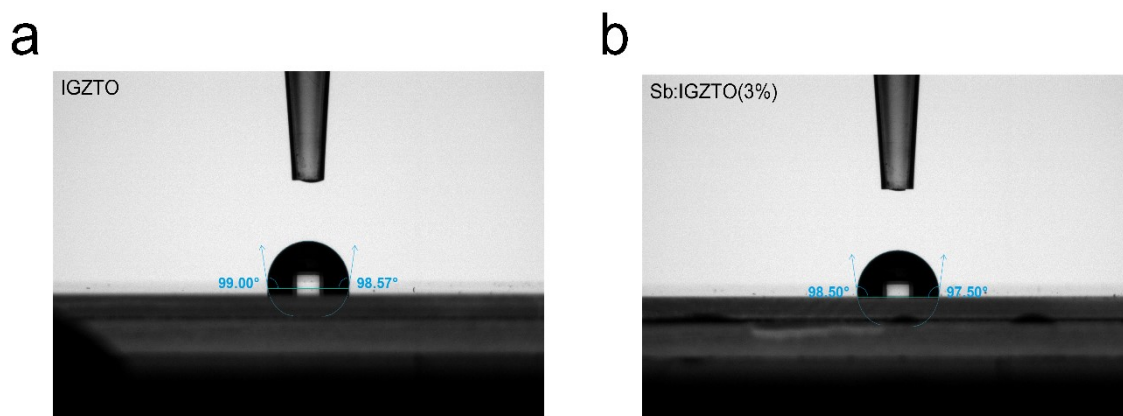

**Figure S6.** Water contact angle images of IGZTO and Sb:IGZTO (3%) thin films

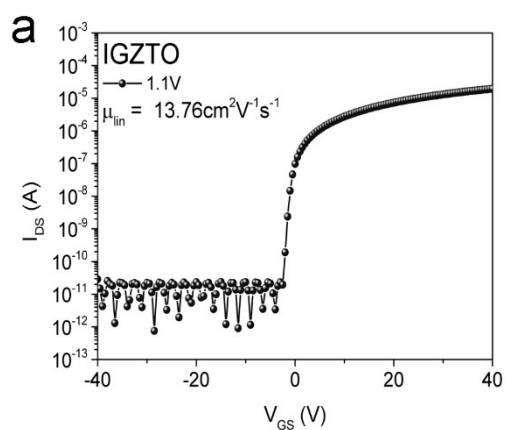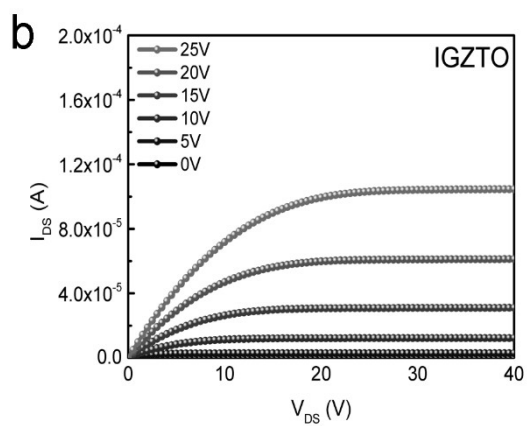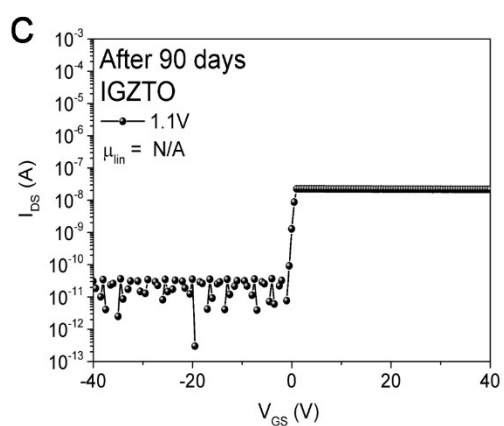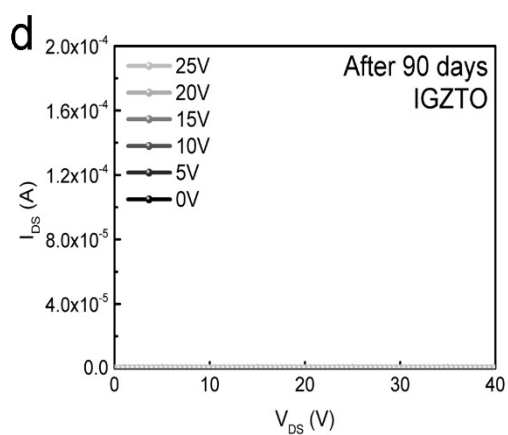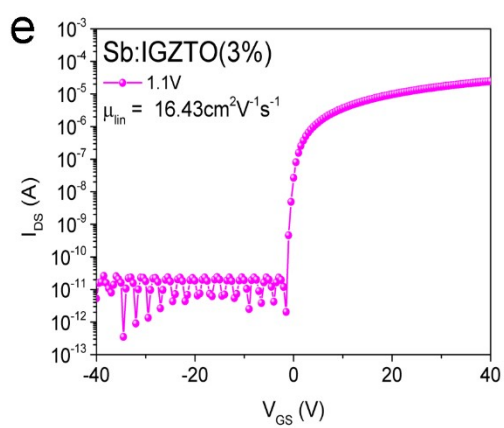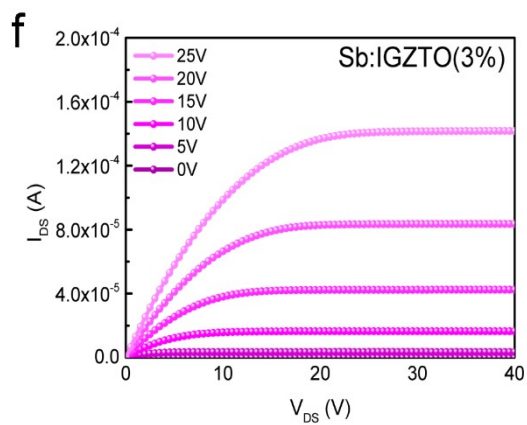

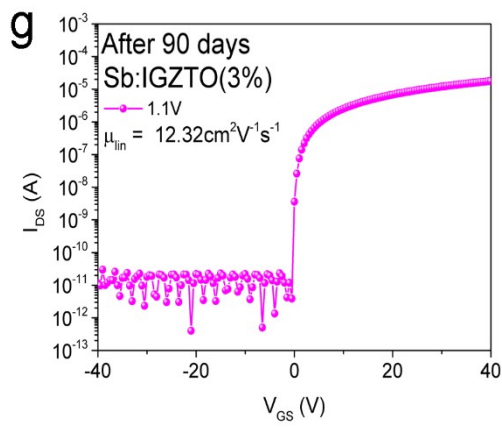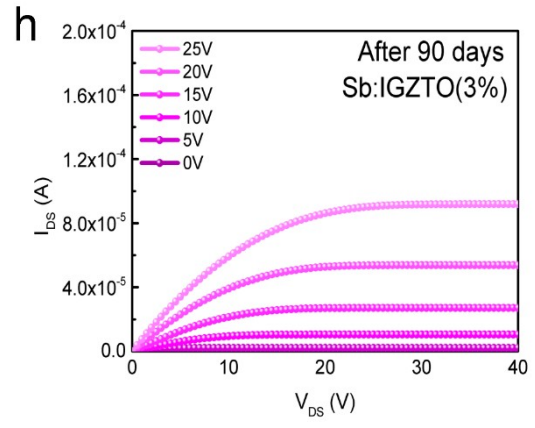

**Figure S7.** Transfer ( $I_{DS}$ – $V_{GS}$ ) and Output ( $I_{DS}$ – $V_{DS}$ ) characteristics of (a-d) the IGZTO TFTs and (e-h) Sb:IGZTO(3%) TFTs at initial and after 90 days (RH 85%, 85°C temperature), respectively.



| Process                 | Channel materials       | Initial Mobility<br>[cm <sup>2</sup> V <sup>-1</sup> s <sup>-1</sup> ] | Long term stability period<br>[days] | Storage environment        | Retention rate relative to the initial mobility.<br>[%] | Ref       |
|-------------------------|-------------------------|------------------------------------------------------------------------|--------------------------------------|----------------------------|---------------------------------------------------------|-----------|
| RF magnetron sputtering | Hydrogenated IGZO(HPHA) | 9.4                                                                    | 145                                  | Air ambient                | 81.91                                                   | [43]      |
| Solution                | a-IGZO                  | 4.20±0.15                                                              | 6                                    | Under 5% RH at RT.         | 84.76                                                   | [44]      |
|                         |                         |                                                                        |                                      | Over 90% RH at RT          | 54.29                                                   |           |
| Solution                | a-WTZO                  | 0.5                                                                    | 31                                   | Air ambient                | No mobility data available, increased off-current.      | [45]      |
| Solution                | a-Sb:IGZTO              | 16.43                                                                  | 90                                   | 85% RH at 85°C temperature | 74.98                                                   | This work |

**Table S1.** Comparison of Long-Term Stability Parameters for Thin-Film Transistors Fabricated with Various Storage Environments and Channel Materials.
